# Supplementary material for: TRIM37 Promotes Pancreatic Cancer Progression through Modulation of Cell Growth, Migration, Invasion, and Tumor Immune Microenvironment
Source: MDPI journal article supplement (doi:10.3390/ijms23031176), 2022-01-21
Supplement: s1 [file s1]

## Supplementary Material:

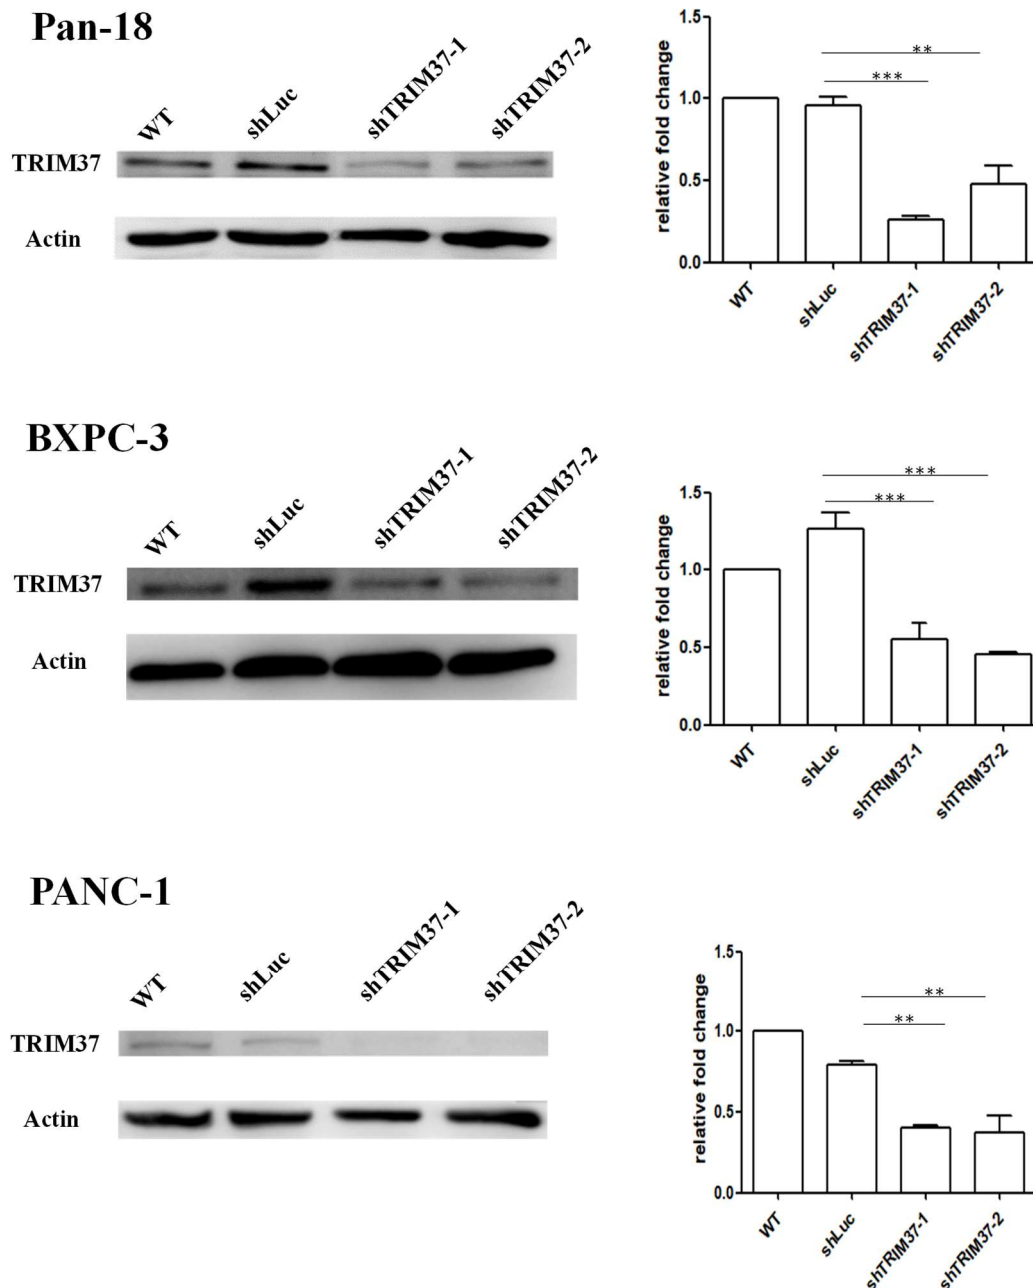

**Supplemental Figure S1:** *shTRIM37s reduce the protein expression of TRIM37 in pancreatic cancer cells*

The western blot was performed to measure TRIM37 protein level in Pan18, BxPC-3 and PANC-1 after infected with lentivirus containing shTRIM37 or shLuc plasmid. The expression level of TRIM37 was normalized to  $\beta$ -actin using Image J software. The relative fold change defines the level of relative expression compared to that of WT group. Numbers were represented the mean of relative fold change  $\pm$  SEM (n=3). Statistical significance was determined using one-way ANOVA with the Bonferroni's post-test ( $p < 0.01$ : \*\*,  $p < 0.001$ : \*\*\* compared to shLuc).
